# Supplementary material for: ERECTA, salicylic acid, abscisic acid, and jasmonic acid modulate quantitative disease resistance of Arabidopsis thaliana to Verticillium longisporum
Source: PubMed Central journal article supplement (PMC4021371; doi:10.1186/1471-2229-14-85), 2014-04-01
Supplement: 1471-2229-14-85-S1.pdf [file 1471-2229-14-85-S1.pdf]

## Additional File 1: Marker information

Table I: Overview of markers used for genotyping the (BurxLer) RIL Population

| Marker Name | Marker Type | Chr. | Source                                       |
|-------------|-------------|------|----------------------------------------------|
| nga59       | SSR         | 1    | TAIR                                         |
| F16J7-TRB   | SSR         | 1    | TAIR                                         |
| JV26/27     | SSR         | 1    | TAIR                                         |
| NF19G9      | SSR         | 1    | TAIR                                         |
| nga392      | SSR         | 1    | TAIR                                         |
| SO392       | SSR         | 1    | TAIR                                         |
| ciw1        | SSR         | 1    | TAIR                                         |
| nga128      | SSR         | 1    | TAIR                                         |
| nga111      | SSR         | 1    | TAIR                                         |
| nga692      | SSR         | 1    | TAIR                                         |
| nga114      | SSR         | 2    | TAIR                                         |
| PLS5        | SSR         | 2    | TAIR                                         |
| nga361      | SSR         | 2    | TAIR                                         |
| t32f646516  | SSR         | 2    | (O'Neill <i>et al.</i> , 2008) <sup>1)</sup> |
| BIO2        | SSR         | 2    | TAIR                                         |
| nga172      | SSR         | 3    | TAIR                                         |
| nga126      | SSR         | 3    | TAIR                                         |
| nga162      | SSR         | 3    | TAIR                                         |
| ciw11       | SSR         | 3    | TAIR                                         |
| F1P2-TGF    | SSR         | 3    | TAIR                                         |
| ciw27       | SSR         | 3    | TAIR                                         |
| nga6        | SSR         | 3    | TAIR                                         |
| nga8        | SSR         | 4    | TAIR                                         |
| nga1111     | SSR         | 4    | TAIR                                         |
| DET1.2      | SSR         | 4    | TAIR                                         |
| ciw6        | SSR         | 4    | TAIR                                         |
| ciw7        | SSR         | 4    | TAIR                                         |
| nga1139     | SSR         | 4    | TAIR                                         |
| nga1107     | SSR         | 4    | TAIR                                         |
| ciw15       | SSR         | 5    | TAIR                                         |
| nga249      | SSR         | 5    | TAIR                                         |
| CA72        | SSR         | 5    | TAIR                                         |
| nga151      | SSR         | 5    | TAIR                                         |
| nga139      | SSR         | 5    | TAIR                                         |
| SO262       | SSR         | 5    | TAIR                                         |
| SO191       | SSR         | 5    | TAIR                                         |
| nga129      | SSR         | 5    | TAIR                                         |
| ciw10       | SSR         | 5    | TAIR                                         |
| MBK5        | SSR         | 5    | TAIR                                         |
| EH1-1       | SCAR        | 1    | (Häffner <i>et al.</i> , 2010) <sup>2)</sup> |
| EH1-2       | SCAR        | 1    | Häffner <i>et al.</i> 2010                   |
| EH1-3       | SCAR        | 1    | Häffner <i>et al.</i> 2010                   |
| EH2-1       | SCAR        | 2    | Häffner <i>et al.</i> 2010                   |
| EH2-3a      | SCAR        | 2    | Häffner <i>et al.</i> 2010                   |
| EH2-4       | SCAR        | 2    | Häffner <i>et al.</i> 2010                   |
| EH2-6       | SCAR        | 2    | See Table IIA                                |
| EH2-7       | SCAR        | 2    | See Table IIA                                |
| EH2-10      | SCAR        | 2    | See Table IIA                                |
| EH2-12      | SCAR        | 2    | See Table IIA                                |
| EH3-1       | SCAR        | 3    | Häffner <i>et al.</i> 2010                   |
| EH3-3       | SCAR        | 3    | Häffner <i>et al.</i> 2010                   |
| EH3-5       | SCAR        | 3    | See Table S2                                 |
| EH4-1       | SCAR        | 4    | Häffner <i>et al.</i> 2010                   |
| EH4-2       | SCAR        | 4    | See Table IIA                                |
| EH5-4       | SCAR        | 5    | See Table IIA                                |
| EH5-5       | SCAR        | 5    | See Table IIA                                |
| EH5-7       | SCAR        | 5    | Häffner <i>et al.</i> 2010                   |
| EH5-8       | SCAR        | 5    | See Table IIA                                |
| EH5-9       | SCAR        | 5    | Häffner <i>et al.</i> 2010                   |
| EH5-10      | SCAR        | 5    | See Table IIA                                |
| BLC1-5      | CAPS        | 1    | See Table IIB                                |
| BLC1-6      | CAPS        | 1    | See Table IIB                                |
| BLC1-21     | CAPS        | 1    | See Table IIB                                |
| BLC1-26     | CAPS        | 1    | See Table IIB                                |
| BLC1-28     | CAPS        | 1    | See Table IIB                                |
| BLC1-34     | CAPS        | 1    | See Table IIB                                |
| BLC2-1      | CAPS        | 2    | See Table IIB                                |
| BLC2-2      | CAPS        | 2    | See Table IIB                                |
| BLC2-5      | CAPS        | 2    | See Table IIB                                |
| BLC2-7      | CAPS        | 2    | See Table IIB                                |
| BLC2-9      | CAPS        | 2    | See Table IIB                                |
| BLC2-17     | CAPS        | 2    | See Table IIB                                |
| BLC4-22     | CAPS        | 4    | See Table IIB                                |
|             |             |      |                                              |
|             |             |      |                                              |
|             |             |      |                                              |
|             |             |      |                                              |

<sup>1)</sup> O'Neill CM, Morgan C, Kirby J, Tschoep H, Deng PX, Brennan M, Rosas U, Fraser F, Hall C, Gill S *et al.*: **Six new recombinant inbred populations for the study of quantitative traits in *Arabidopsis thaliana*.** *Theor Appl Genet* 2008, **116**:623-634.

<sup>2)</sup> Häffner E, Karlovsky P, Diederichsen E: **Genetic and environmental control of the *Verticillium* syndrome in *Arabidopsis thaliana*.** *BMC Plant Biol* 2010, **10**:235.

Table II: Technical information on new markers for the (BurxLer) RIL Population

A. SCAR-Markers

|        |                        | T <sub>m</sub> |                         | T <sub>m</sub><br>(°C) | T <sub>a</sub><br>(°C) | t <sub>e</sub><br>(s) | Fragment<br>Bur (bp) | Fragment<br>Ler(bp) |
|--------|------------------------|----------------|-------------------------|------------------------|------------------------|-----------------------|----------------------|---------------------|
| EH2-6  | GTGTCTCAAAAAGTTGGATGTC | 62             | TCGAGTAGGTCAAGCCAACG    | 62                     | 55                     | 30                    | 183                  | 173                 |
| EH2-7  | CTGTGGTCGAACAGTCGAAG   | 62             | CATCGTCACACACAGGCGGG    | 66                     | 55                     | 30                    | 278                  | 269                 |
| EH2-10 | CTCTTCTTCGTCATACCATCC  | 62             | TTTCTTACAGCACTTCTACTTT  | 58                     | 55                     | 30                    | 214                  | 203                 |
| EH2-12 | TAGTGTGGTTGGGGTCGTC    | 58             | GGATGAGAATTTCCGGGATTTT  | 62                     | 55                     | 30                    | 238                  | 226                 |
| EH3-5  | GTGTTGTTTCGTGCTTCCG    | 58             | CTCGTAGTGCATCCGACTCC    | 64                     | 55                     | 30                    | 202                  | 193                 |
| EH4-2  | AAGTGTGGGCTAGCTGATAA   | 58             | AGCCAATAGATGGCTACTCG    | 60                     | 55                     | 30                    | 163                  | 173                 |
| EH5-4  | GCTCGCCGTAAGCTGAAGC    | 64             | GATAGCTGCCGTCACCAAAGACC | 72                     | 55                     | 30                    | 184                  | 195                 |
| EH5-5  | CTCTGTGTTCTAGTTCCCCA   | 60             | CCACATCACCAGGACGCC      | 60                     | 55                     | 30                    | 282                  | 302                 |
| EH5-8  | TCACGATCTGTCTTCTCCGG   | 62             | GGATACTGTCCAAGCAATTCCAC | 68                     | 55                     | 30                    | 292                  | 351                 |
| EH5-10 | CGCAGGAGTTTCTCTCCAA    | 60             | CCTTCGATTCCACTCTTCTC    | 60                     | 55                     | 30                    | 228                  | 216                 |

B. CAPS-Markers

| Marker Name | Based on Polymorphism | Forward Primer         | T <sub>m</sub><br>(°C) | Reverse Primer            | T <sub>m</sub><br>(°C) | T <sub>a</sub><br>(°C) | t <sub>e</sub><br>(s) | Restr. Enzyme | Fragments Bur (bp) | Fragments Ler (bp) |
|-------------|-----------------------|------------------------|------------------------|---------------------------|------------------------|------------------------|-----------------------|---------------|--------------------|--------------------|
| BLC1-5      | Ossowski_33803        | GACAACCTCCAGATCGGTGT   | 62                     | ATGTTCTGTAGAACAGCCGG      | 49.2                   | 55                     | 30                    | BsmFI         | 187, 44            | 231                |
| BLC1-6      | Ossowski_41322        | CTTCTAACTACCAATGATCTC  | 43.4                   | GTGTGCCACGCAGATGACTG      | 64                     | 55                     | 40                    | AluI          | 250                | 169, 81            |
| BLC1-21     | Ossowski_237400       | GCACATGCAGTACACCAACC   | 62                     | ATGACAGAAATAGAGCGAGC      | 58                     | 55                     | 40                    | None/LP       | >236               | 236                |
| BLC1-26     | Ossowski_242350       | GCCGTTGCAGTCACTTGACTC  | 51.2                   | GGATATATGGATCCAGAGTAC     | 45.3                   | 50                     | 40                    | MnlI          | 242                | 126, 116           |
| BLC1-28     | Ossowski_1182884      | GGTCTTGGATTAGCTTAGGC   | 60                     | AATAGCGAGGAGTTTCCAGT      | 58                     | 55                     | 30                    | NdeI          | 214                | 194, 21            |
| BLC1-34     | Ossowski_126257       | TACGTCTATGAGGATACGTC   | 58                     | CTCCATGTGGTCAGGCGGTGG     | 55                     | 49                     | 40                    | None/LP       | <217               | 217                |
| BLC2-1      | Ossowski_391600       | CTGTTGTTTCTTACGTACTG   | 45.3                   | CTGTATGTTCCCCATGATTCTTAC  | 48.9                   | 55                     | 40                    | TruI          | 345, 57            | 402                |
| BLC2-2      | Ossowski_1194744      | GGCTGTCCATTTGCATCTTAC  | 47.3                   | CTCACGAAAAGTCCATGTTGTCTAC | 50.9                   | 55                     | 40                    | BseRI         | 208, 89            | 297                |
| BLC2-5      | BKN000004572          | GCATAGAAGCGATATGAGAATA | 44.1                   | CATCTACTGGATCCGGCTGG      | 51.2                   | 55                     | 40                    | AflIII        | 400, 83            | 483                |
| BLC2-7      | Ossowski_393125       | GCTCTTTACTCCGATCATCG   | 60                     | GAGGTATATCGTGAACCAGTTT    | 62                     | 55                     | 40                    | HincII        | 179, 106           | 286                |
| BLC2-9      | Ossowski_400251       | AGTCATTAAGTTAGGTAATTT  | 37.5                   | TGGTAGTTTATGTACAAGCTA     | 41.4                   | 50                     | 40                    | None/LP       | 265                | >265               |
| BLC2-17     | Ossowski_403057       | GAGTAGTTAACTCTATCACGC  | 45.3                   | TACTTAATTGAGACAAGAGG      | 54                     | 55                     | 40                    | AluI          | 229                | 183, 45            |
| BLC4-22     | Ossowski_780572       | CAATCCCTTGAAGTTCTGAAAC | 46                     | CTGTGGCACCGGATTCAAG       | 60                     | 55                     | 40                    | TaqI          | 298                | 196, 102           |

Abbreviations: T<sub>m</sub> = melting temperature, T<sub>a</sub> = annealing temperature, t<sub>e</sub> = elongation time, bp = base pairs, LP = length polymorphism.
