# Supplementary material for: ERECTA, salicylic acid, abscisic acid, and jasmonic acid modulate quantitative disease resistance of Arabidopsis thaliana to Verticillium longisporum
Source: PubMed Central journal article supplement (PMC4021371; doi:10.1186/1471-2229-14-85), 2014-04-01
Supplement: 1471-2229-14-85-S2.pdf [file 1471-2229-14-85-S2.pdf]

## Additional File 2: Genetic and physical map

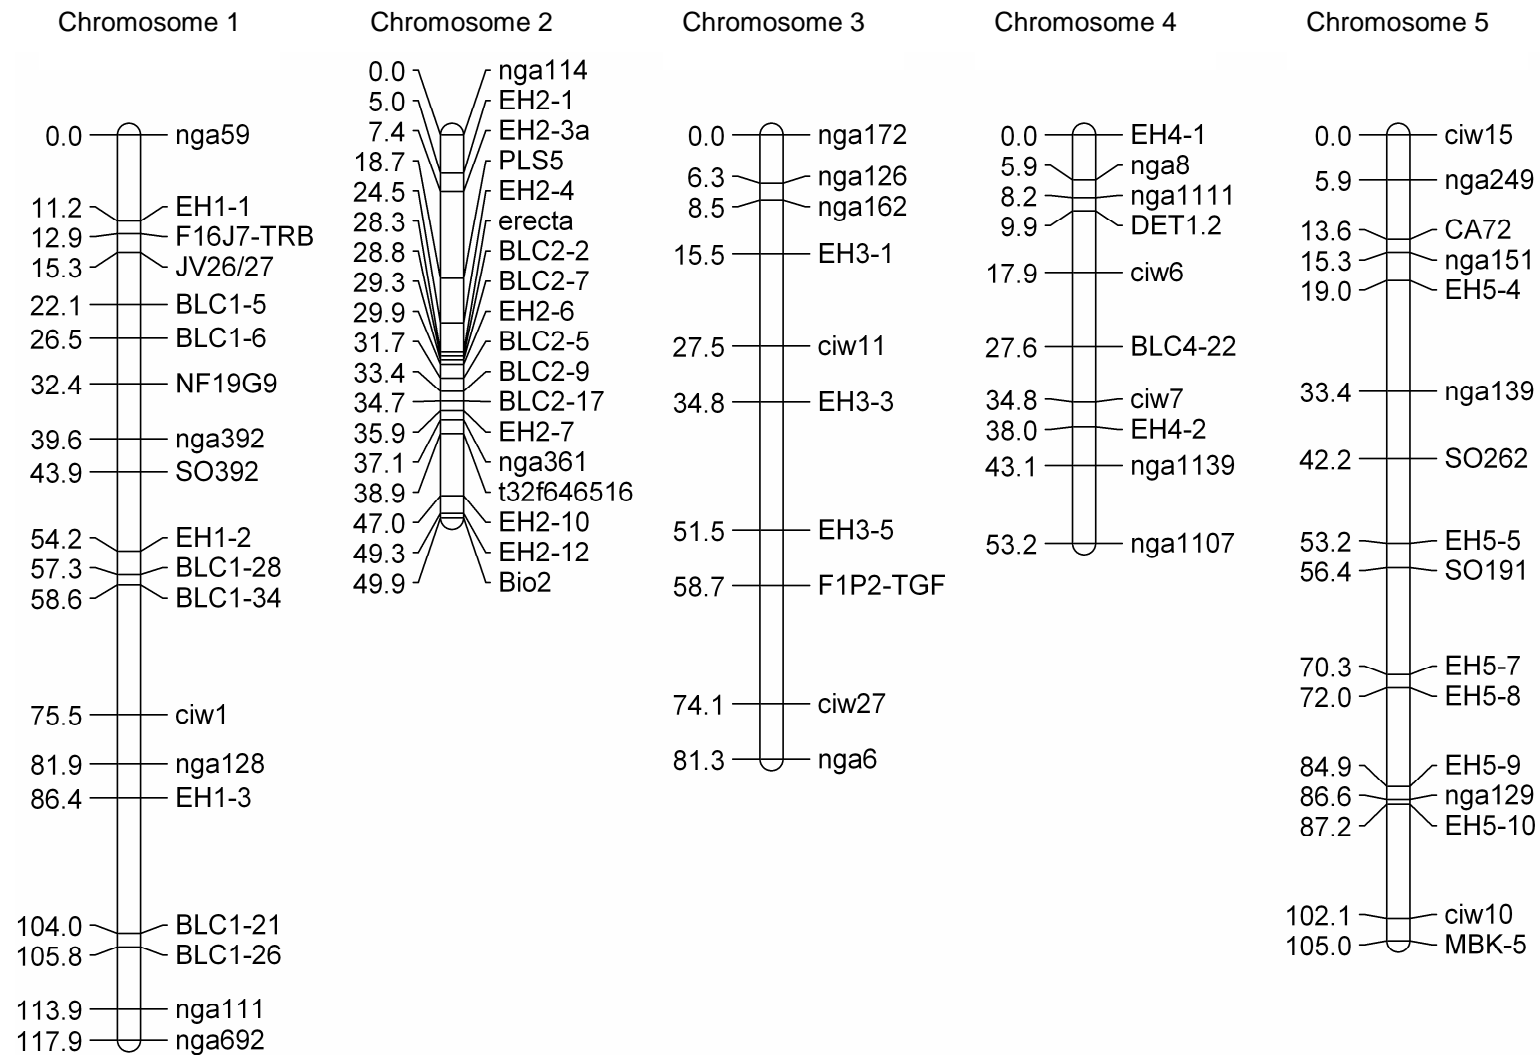

Figure I: Genetic map for the BurxLer Recombinant Inbred Line population created using the Haldane mapping function. Marker names are provided on the right side of each chromosome. Numbers on the left side stand for centiMorgan (cM)

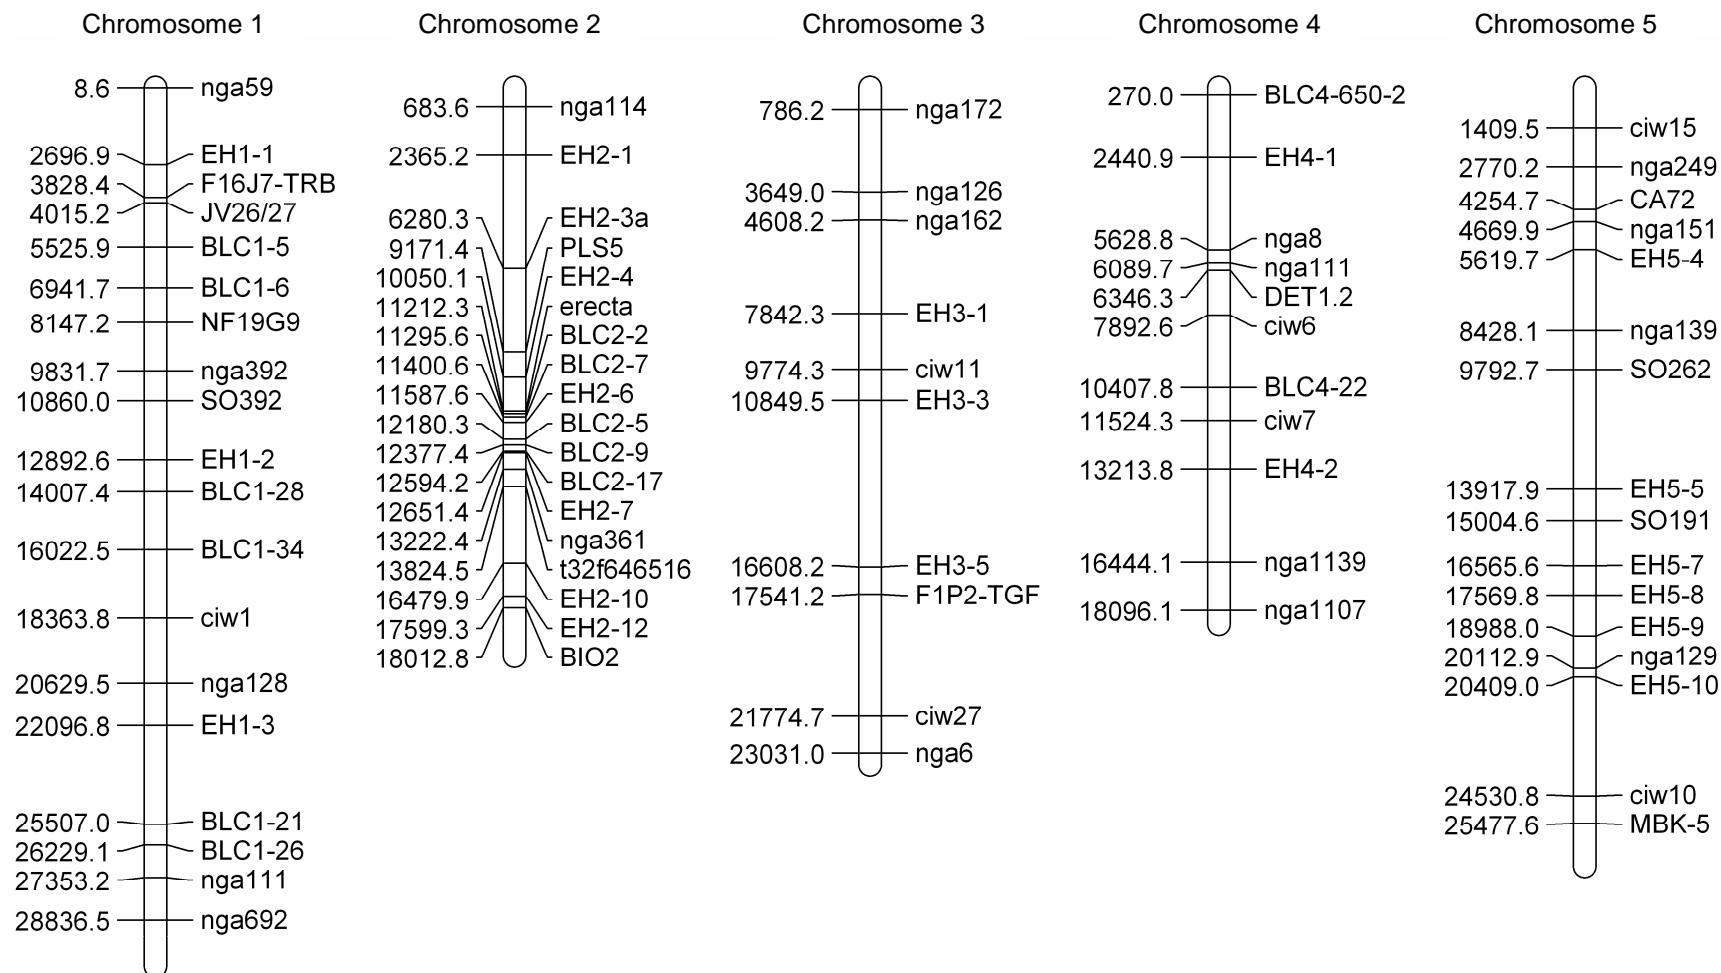

Figure II: Physical map for the (Bur×Ler) RIL population according to AGI (The Arabidopsis Genome Initiative, 2000. Analysis of the genome sequence of the flowering plant *Arabidopsis thaliana*. Nature 408, 796-815). Marker names are provided on the right side of each chromosome. Numbers on the left side stand for kilobases (kb).
