# Supplementary material for: ERECTA, salicylic acid, abscisic acid, and jasmonic acid modulate quantitative disease resistance of Arabidopsis thaliana to Verticillium longisporum
Source: PubMed Central journal article supplement (PMC4021371; doi:10.1186/1471-2229-14-85), 2014-04-01
Supplement: 1471-2229-14-85-S3.pdf [file 1471-2229-14-85-S3.pdf]

### Additional File 3: QTL information

Overview of QTL for *V. longisporum*-related traits detected in a QTL mapping study with 94 (Bur×Ler) RILs in two separate experiments. Most traits were assessed using different parameters. QTL are listed separately for each parameter and experiment. QTL for a trait detected with different parameters or in different experiments were given the same name when the confidence intervals were overlapping. See Figure 2 for visualisation of QTL and confidence intervals.

| Trait – Parameter                                         | Exp. | Chr. | QTL name    | Peak pos. (cM) | Nearest marker | LRS     | LOD   | Add.        | Var. (%)    | Mean±SD for RILs with alleles from |             |
|-----------------------------------------------------------|------|------|-------------|----------------|----------------|---------|-------|-------------|-------------|------------------------------------|-------------|
|                                                           |      |      |             |                |                |         |       |             |             | Bur                                | Ler         |
| <b>Systemic Colonization</b> – % colonized shoot segments | 1    | 2    | <i>vec1</i> | 22/23          | EH2-4          | 8.1*    | 1.76  | 9.30/9.20   | 8           | 22.52±24.79                        | 39.14±33.00 |
|                                                           |      |      |             | 29             | BLC2-2/BLC2-7  | 12.5**  | 2.72  | 10.71       | 12          | 29.10±9.32                         | 41.53±32.37 |
|                                                           |      |      |             | 30             | EH2-6          | 12.8**  | 2.78  | 10.76       | 13          | 19.92±21.98                        | 40.85±32.50 |
|                                                           |      |      |             | 33             | BLC2-5/BLC2-9  | 10.4*   | 2.26  | 9.97        | 10          | 21.41±23.68                        | 40.15±31.90 |
|                                                           |      |      |             | 36             | EH2-7          | 11.5*   | 2.5   | 10.22       | 12          | 20.89±24.43                        | 39.71±31.13 |
|                                                           |      |      |             | 39             | t32f646516     | 15.7**  | 3.41  | 11.83       | 15          | 18.86±22.83                        | 39.94±31.27 |
|                                                           |      | 4    | <i>vec2</i> | 7              | nga8/nga1111   | 15.0**  | 3.26  | 11.76       | 15          | 19.45±25.57                        | 42.02±29.63 |
|                                                           |      |      |             | 9              | nga1111/DET1.2 | 14.3**  | 3.11  | 11.55       | 14          | 18.20±25.28                        | 41.26±29.41 |
|                                                           |      |      |             | 13/14          | DET1.2/ciw6    | 14.9**  | 3.24  | 12.63/12.66 | 15          | 17.14±24.81                        | 39.47±29.78 |
|                                                           |      |      | <i>vec3</i> | 22/23          | ciw6           | 14.4**  | 3.13  | 12.70/12.74 | 14          | 18.08±26.26                        | 40.21±28.94 |
|                                                           |      |      |             | 37             | ciw7/EH4-2     | 7.6*    | 1.65  | 8.73        | 8           | 23.31±28.73                        | 37.02±29.60 |
|                                                           | 2    | 2    | <i>vec1</i> | 23             | EH2-4          | 13.8**  | 3.0   | 12.03       | 14          | 37.47±28.96                        | 59.29±27.53 |
|                                                           |      |      |             | 28             | erecta         | 19.3*** | 4.19  | 13.19       | 19          | 35.74±28.1                         | 62.17±25.62 |
|                                                           |      |      |             | 30             | EH2-6          | 18.2*** | 3.96  | 12.86       | 18          | 35.74±27.43                        | 60.67±27.64 |
|                                                           |      |      |             | 33             | BLC2-5/BLC2-9  | 9.5*    | 2.07  | 9.72        | 10          | 39.38±29.11                        | 57.59±28.31 |
|                                                           |      |      |             | 36             | EH2-7          | 10.4**  | 2.26  | 9.92        | 11          | 38.11±29.94                        | 56.96±26.85 |
|                                                           |      |      |             | 39             | t32f646516     | 11.1**  | 2.41  | 10.24       | 11          | 37.60±29.92                        | 56.80±26.86 |
|                                                           |      | 4    | <i>vec2</i> | 6              | nga8           | 13.7**  | 2.98  | 11.18       | 14          | 35.79±28.95                        | 58.17±27.26 |
|                                                           |      |      |             | 13             | DET1.2         | 9.3*    | 2.02  | 10.24       | 10          | 35.88±30.39                        | 54.39±27.67 |
|                                                           |      |      | <i>vec3</i> | 25             | BLC4-22        | 11.7**  | 2.54  | 11.48       | 12          | 36.51±30.21                        | 56.80±26.64 |
| 34                                                        |      |      |             | ciw7           | 15.9**         | 3.46    | 12.38 | 16          | 36.01±29.47 | 58.31±29.47                        |             |
|                                                           |      |      | 37          | ciw7/EH4-2     | 17.3***        | 4.12    | 13.04 | 17          | 36.01±29.47 | 58.31±29.47                        |             |

|                                                                                                                      |                |                |                |              |               |         |        |             |             |             |               |             |
|----------------------------------------------------------------------------------------------------------------------|----------------|----------------|----------------|--------------|---------------|---------|--------|-------------|-------------|-------------|---------------|-------------|
| <b>Systemic Colonization</b> –<br>pg <i>Verticillium</i> DNA/mg<br>Fresh Weight                                      | 1              | 2              | <i>vec1</i>    | 22           | PLS5/EH2-4    | 11.5**  | 2.74   | 36.49       | 12          | 34.93±66.23 | 98.37±118.08  |             |
|                                                                                                                      |                |                |                | 26           | EH2-4/erecta  | 11.7**  | 2.54   | 36.19       | 12          | 33.14±64.75 | 99.71±118.62  |             |
|                                                                                                                      |                |                |                | 29           | BLC2-2        | 14.9**  | 3.24   | 38.39       | 15          | 25.81±43.44 | 101.92±119.28 |             |
|                                                                                                                      |                |                |                | 30           | EH2-6         | 14.9**  | 3.24   | 38.39       | 15          | 24.29±39.46 | 99.02±117.14  |             |
|                                                                                                                      |                |                |                | 33           | BLC2-5/BLC2-9 | 10.7*   | 2.33   | 33.60       | 11          | 30.78±52.08 | 93.59±115.38  |             |
|                                                                                                                      |                |                |                | 36           | EH2-7         | 10.8*   | 2.35   | 32.87       | 11          | 31.54±54.05 | 91.75±117.26  |             |
|                                                                                                                      |                |                |                | 39           | t32f646516    | 12.0**  | 2.61   | 34.72       | 12          | 31.01±55.95 | 91.28±112.88  |             |
|                                                                                                                      |                | 4              | <i>vec2</i>    | 6            | nga8          | 9.3*    | 2.02   | 30.53       | 10          | 32.93±79.56 | 94.72±116.29  |             |
|                                                                                                                      | 2              | 2              | <i>vec1</i>    | 24           | EH2-4         | 7.8*    | 1.70   | 25.38       | 8           | 37.59±49.94 | 86.07±105.48  |             |
|                                                                                                                      |                |                |                | 29           | BLC2-2        | 10.5*   | 2.28   | 28.56       | 11          | 35.60±27.93 | 92.45±105.79  |             |
|                                                                                                                      |                |                |                | 30           | EH2-6         | 10.9*   | 2.37   | 28.88       | 11          | 34.03±46.59 | 90.23±103.7   |             |
|                                                                                                                      |                |                |                | 33           | BLC2-5/BLC2-9 | 6.8*    | 1.48   | 23.56       | 7           | 39.18±59.58 | 84.16±100.51  |             |
|                                                                                                                      |                |                |                | 35           | BLC2-17       | 7.5*    | 1.63   | 24.23       | 8           | 39.09±60.36 | 91.10±103.70  |             |
|                                                                                                                      |                |                |                | 39           | t32f646516    | 7.1*    | 1.54   | 23.49       | 8           | 36.91±60.54 | 88.98±100.50  |             |
| <b>Stunting Resistance</b> –<br>Performance Height (%)                                                               | 1              | 1              | <i>stre2</i>   | 103          | BLC1-21       | 22.4*** | 4.87   | 10.63       | 19          | 46.66±21.35 | 64.69±20.44   |             |
|                                                                                                                      |                |                |                | 106/107      | BLC1-26       | 22.9*** | 4.98   | 10.70       | 21          | 45.75±21.33 | 67.34±18.30   |             |
|                                                                                                                      |                |                |                | <i>stre1</i> | 117           | nga692  | 16.8** | 3.65        | 10.11       | 18          | 44.32±22.53   | 63.99±20.03 |
|                                                                                                                      |                | 2              | <i>r-stre1</i> | 27           | erecta        | 35.6*** | 7.74   | -13.10      | 32          | 66.28±17.64 | 40.85±19.86   |             |
|                                                                                                                      |                |                |                | 29           | BLC2-7        | 32.8*** | 7.13   | -10.35      | 29          | 65.84±18.01 | 41.00±20.16   |             |
|                                                                                                                      | <i>r-stre2</i> |                | 40/41          | t32f646516   | 21.5***       | 4.67    | -10.69 | 20          | 64.64±20.32 | 44.53±20.40 |               |             |
|                                                                                                                      | 4              | <i>r-stre3</i> | 21             | ciw6         | 12.7**        | 3.02    | 8.85   | 13          | 47.50±21.34 | 61.99±20.72 |               |             |
|                                                                                                                      | 2              | 2              | <i>r-stre1</i> | 28           | erecta        | 15.0**  | 3.26   | -7.47       | 15          | 90.75±21.69 | 75.79±13.12   |             |
|                                                                                                                      |                |                |                | 29           | BLC2-7        | 14.4**  | 3.13   | -7.38       | 14          | 90.56±21.89 | 75.72±13.28   |             |
|                                                                                                                      |                |                | <i>r-stre2</i> | 42           | t32f646516    | 7.3*    | 1.59   | -5.85       | 7           | 88.30±24.52 | 78.45±12.20   |             |
| <b>Chlorosis</b> – No. of chlorotic<br>leaves in inoculated plants                                                   | 1              | 4              | <i>r-chl1</i>  | 6            | nga8          | 27.6*** | 6.00   | -0.61       | 26          | 4.34±1.04   | 3.11±1.07     |             |
|                                                                                                                      |                |                |                | 10           | DET1.2        | 29.3*** | 6.37   | -0.64       | 27          | 4.42±1.06   | 3.14 ±1.03    |             |
| <b>Chlorosis</b> – % chlorotic<br>leaves in inoculated plants                                                        | 1              | 2              | <i>r-chl2</i>  | 33           | BLC2-5/BLC2-9 | 11.7**  | 2.54   | -3.46       | 13          | 29.68±9.48  | 23.29±7.81    |             |
|                                                                                                                      |                | 4              | <i>r-chl1</i>  | 6            | nga8          | 13**    | 2.83   | -3.61       | 15          | 30.46±8.70  | 23.23±8.67    |             |
|                                                                                                                      |                |                |                | 10           | DET1.2        | 8.9*    | 1.93   | -3.16       | 10          | 30.30 ±7,22 | 23,98±9.85    |             |
| <b>Chlorosis</b> – Difference in<br>mean No. of chlorotic leaves<br>between inoculated and<br>mock-inoculated plants | 1              | 1              | <i>r-chl3</i>  | 50/51        | EH1-2         | 11.9**  | 2.59   | -0.44       | 12          | 2.48±1.11   | 1.72±1.09     |             |
|                                                                                                                      |                |                |                | 56           | BLC1-28       | 13.3**  | 2.89   | -0.43       | 13          | 2.55±1.03   | 1.74±1.07     |             |
|                                                                                                                      |                |                |                | 59/60        | BLC1-34       | 14.8**  | 3.22   | -0.44/-0.46 | 15          | 2.53±1.03   | 1.61±0.96     |             |
|                                                                                                                      |                | 4              | <i>r-chl1</i>  | 7            | nga8/nga1111  | 11.3**  | 2.46   | -0.40       | 11          | 2.52±1.02   | 1.76±1.16     |             |
|                                                                                                                      |                |                |                | 11           | DET1.2        | 15.7**  | 3.41   | -0.48       | 16          | 2.63±1.03   | 1.72±1.08     |             |

|                                         |   |   |            |       |            |        |      |       |    |            |            |
|-----------------------------------------|---|---|------------|-------|------------|--------|------|-------|----|------------|------------|
| Development Time –<br>Days to flowering | 1 | 4 | <i>dt1</i> | 3     | EH4-1/nga8 | 12.2** | 2.65 | -3.21 | 13 | 28.76±9.84 | 23.21±6.16 |
|                                         |   |   | <i>dt2</i> | 11/12 | DET1.2     | 15.5** | 3.37 | -3.49 | 15 | 29.46±9.96 | 23.17±6.03 |
|                                         | 2 | 4 | <i>dt1</i> | 2     | EH4-1      | 15.8** | 3.43 | -1.48 | 16 | 24.03±3.81 | 21.63±2.63 |
|                                         |   |   | <i>dt2</i> | 9/10  | DET1.2     | 15.3** | 3.33 | -1.40 | 15 | 24.18±3.97 | 21.68±2.60 |

Asterisks denote the genome-wide confidence level for a QTL as determined by permutation test (P = 0.37, 0.95 and 0.99 respectively). Negative values for the additive component stand for Bur origin of the increasing allele, positive values for Ler origin.

(Abbreviations: Exp. = experiment, Chr. = chromosome, Peak pos. = peak position, cM = centiMorgan, LRS = Likelihood Ratio Statistic, LOD = Likelihood of Odds, Add. = Additive component, Var. = explained trait variance).
