# Supplementary material for: ERECTA, salicylic acid, abscisic acid, and jasmonic acid modulate quantitative disease resistance of Arabidopsis thaliana to Verticillium longisporum
Source: PubMed Central journal article supplement (PMC4021371; doi:10.1186/1471-2229-14-85), 2014-04-01
Supplement: 1471-2229-14-85-S4.pdf [file 1471-2229-14-85-S4.pdf]

# Additional File 4: Frequency distribution of phenotypic data

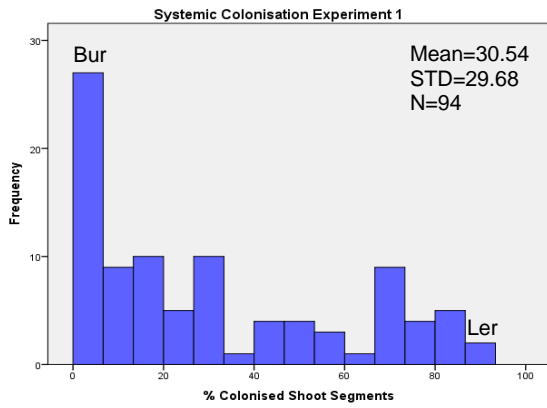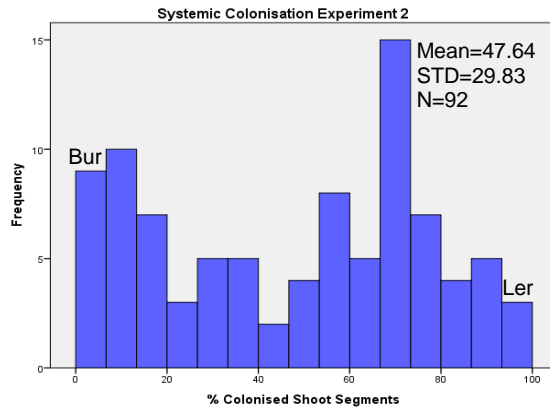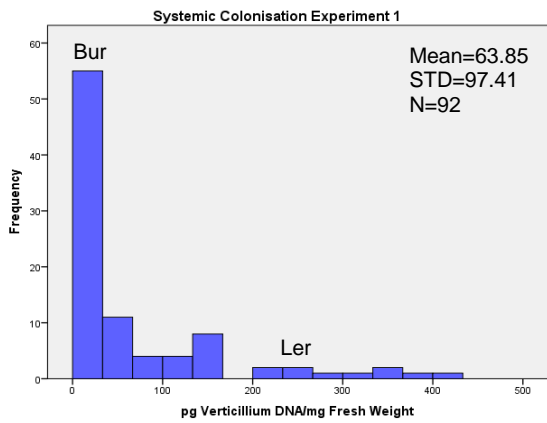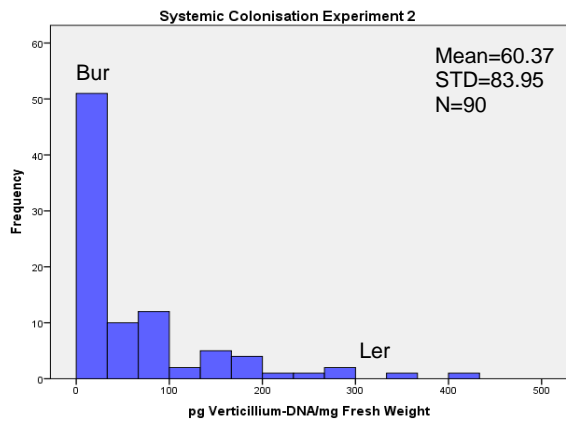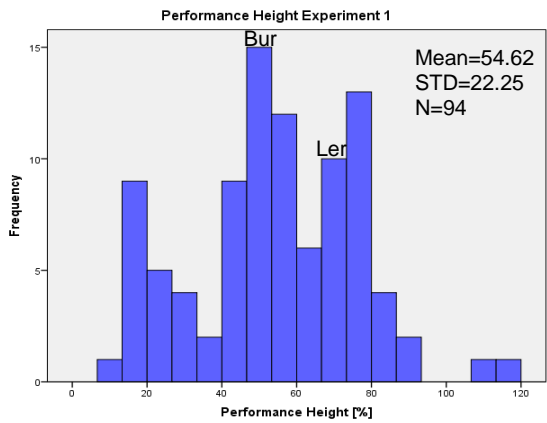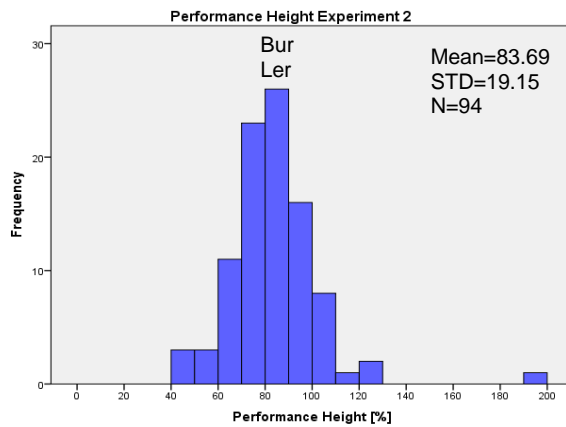

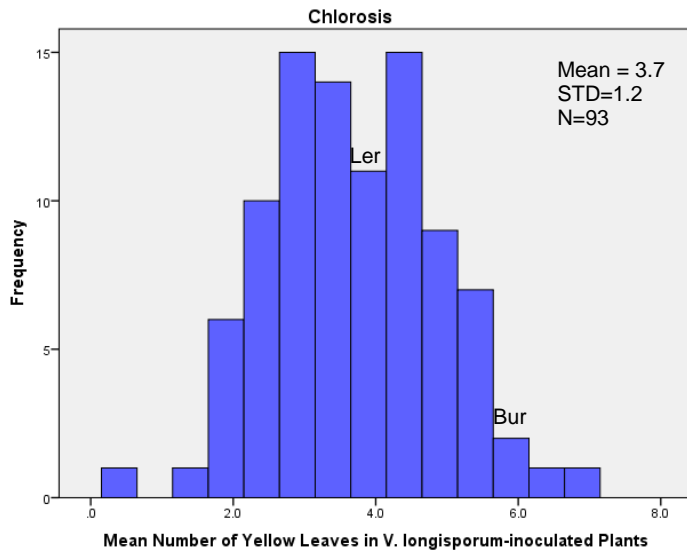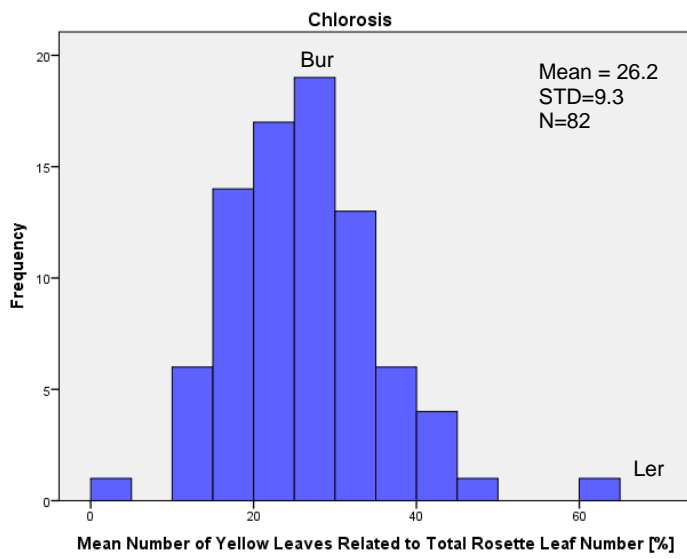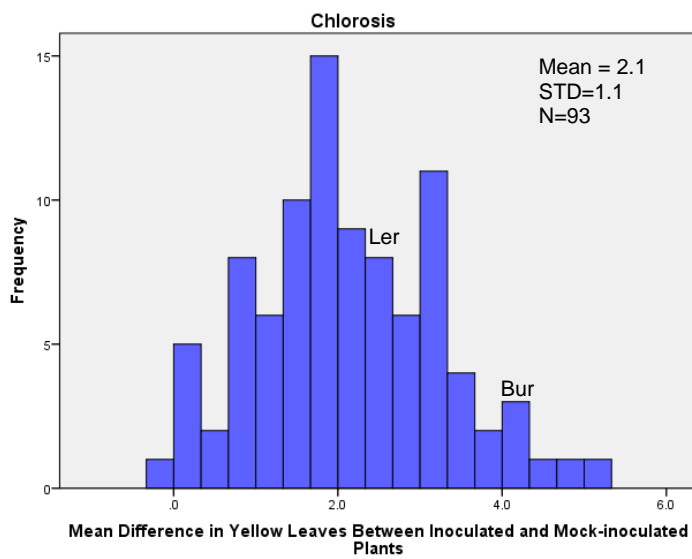

Frequency distributions for *V. longisporum*-related parameters used in QTL-mapping in the (Bur×Ler) RIL population.
