# Supplementary material for: ERECTA, salicylic acid, abscisic acid, and jasmonic acid modulate quantitative disease resistance of Arabidopsis thaliana to Verticillium longisporum
Source: PubMed Central journal article supplement (PMC4021371; doi:10.1186/1471-2229-14-85), 2014-04-01
Supplement: 1471-2229-14-85-S5.pdf [file 1471-2229-14-85-S5.pdf]

## Additional File 5: Systemic colonization of *Erecta* signalling mutants and corresponding wildtypes

Additional File 5 provides evidence that *Erecta* is not involved in mediating resistance to systemic colonization by *V. longisporum*.

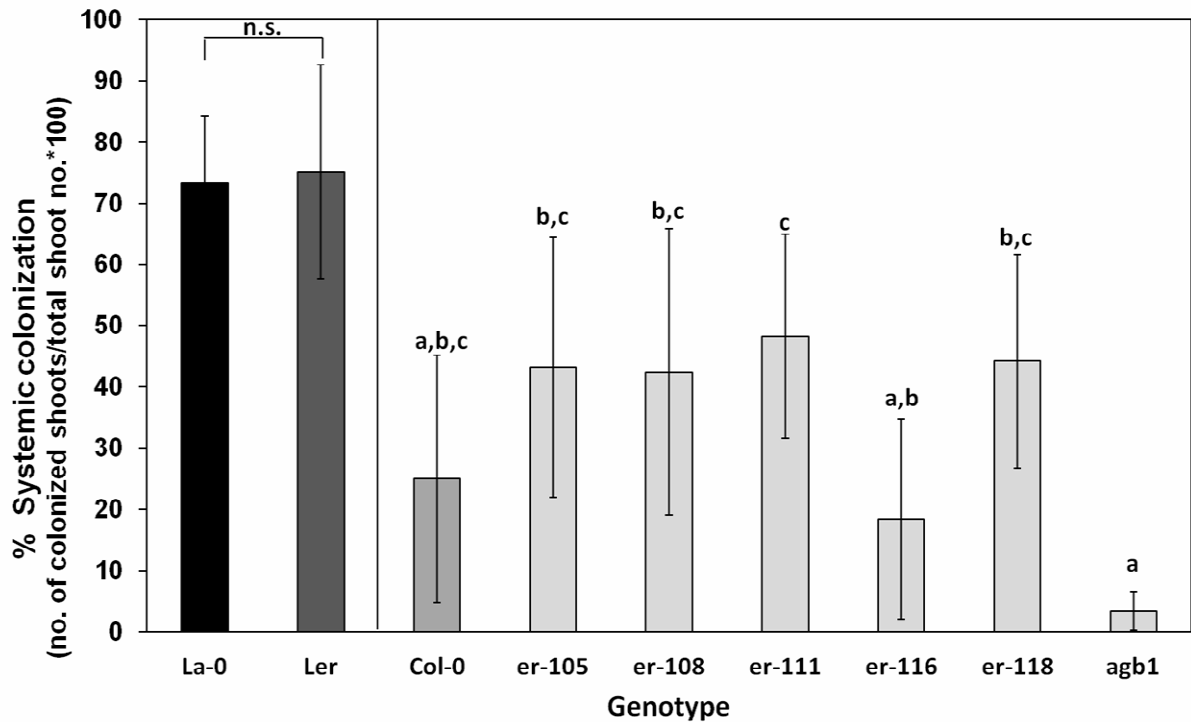

Systemic colonization by *V. longisporum* in *Erecta*-signalling mutants and corresponding WT lines. La-0 is the corresponding WT for *Ler*, Col-0 for *er-105*, *er-108*, *er-116*, *er-118*, and *agb1-1*. Different WT/mutant combinations are separated by a vertical bar. Significance of La-0/*Ler*-differences was tested by t-tests (N = 10); differences between lines with Col-0-background by one-way ANOVA and subsequent multiple comparisons (Tukey test, N = 10). Means marked with different letters differed significantly at  $p < 0.05$ . Vertical bars denote standard deviations.
