# Supplementary material for: ERECTA, salicylic acid, abscisic acid, and jasmonic acid modulate quantitative disease resistance of Arabidopsis thaliana to Verticillium longisporum
Source: PubMed Central journal article supplement (PMC4021371; doi:10.1186/1471-2229-14-85), 2014-04-01
Supplement: 1471-2229-14-85-S6.pdf [file 1471-2229-14-85-S6.pdf]

## Additional File 6: SA contents in Bur, Ler and NILs

Additional File 6 provides evidence that SA hyperinduction, which is characteristic for Bur, is not associated with the *vec1*-locus.

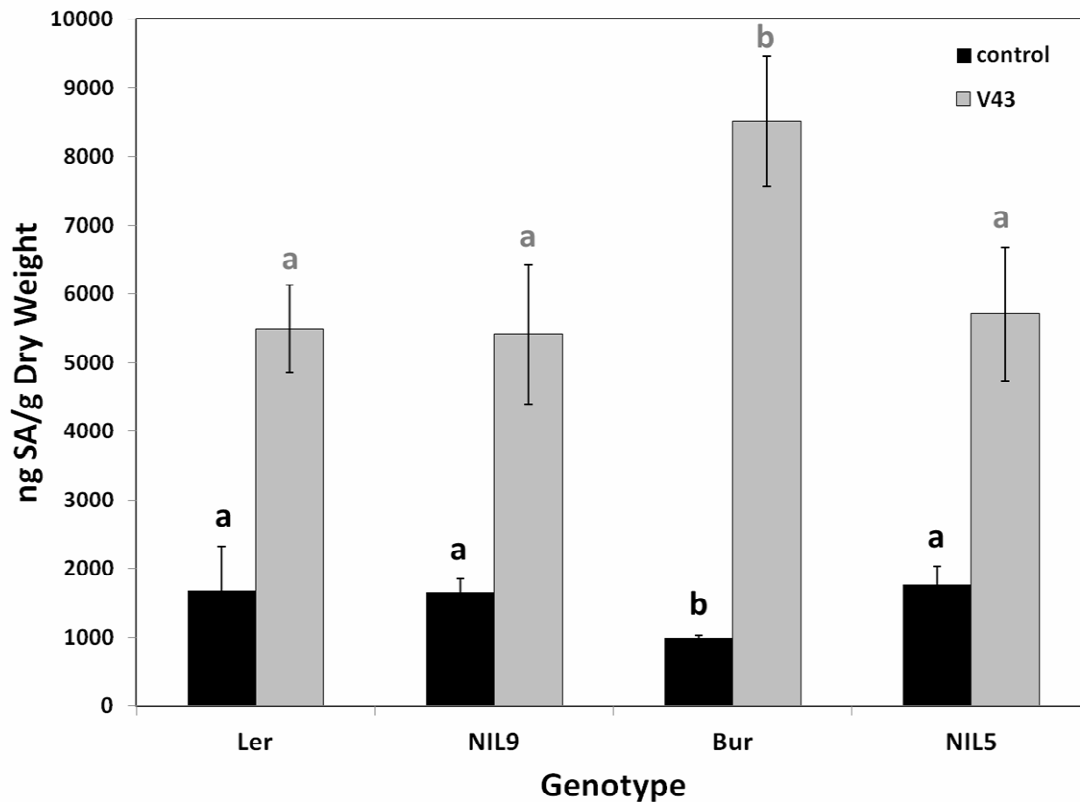

SA-content of Bur, Ler and two near-isogenic lines: NIL9 (*Ler*-alleles in the variable region) and NIL5 (*Bur*-alleles). Differences between mock- and *V. longisporum*-inoculated plants were significant ( $n = 6-7$ ,  $p < 0.05$ ). Means of plants marked with different letters **within one treatment** (mock- and *V. longisporum*-inoculated, respectively) differed significantly at  $p < 0.05$ . (one-way ANOVA and post-hoc Tukey test). Vertical bars denote standard deviations.
